# Supplementary material for: Cancerin: A computational pipeline to infer cancer-associated ceRNA interaction networks
Source: PubMed Central journal article supplement (PMC6072113; doi:10.1371/journal.pcbi.1006318), 2018-07-16
Supplement: pcbi.1006318.s003.pdf [file pcbi.1006318.s003.pdf]

**S1 Table: Number of PPIs and TF-gene interactions included in the inferred ceRNA networks**

|                                                               |                                              | <b>BRCA</b> | <b>KIRC</b> | <b>HNSC</b> |
|---------------------------------------------------------------|----------------------------------------------|-------------|-------------|-------------|
| No. of ceRNA interactions that were also PPIs                 | Cancerin (original)                          | 35 (0.85%)  | 29 (0.63%)  | 20 (0.73%)  |
|                                                               | Cancerin (only_miRNA)                        | 42 (1.03%)  | 45 (0.71%)  | 42 (1.1%)   |
|                                                               | Correlation-based method                     | 257 (0.98%) | 358 (0.77%) | 177 (1.05%) |
|                                                               | Cancerin (OLS regression)                    | 39 (0.65%)  | 110 (0.57%) | 204 (1.26%) |
|                                                               | Cancerin (sensitivity filtering deactivated) | 61 (0.87%)  | 149 (0.79%) | 66 (0.81%)  |
| No. of ceRNA interactions that were also TF-gene interactions | Cancerin (original)                          | 32 (0.78%)  | 4 (0.09%)   | 5 (0.18%)   |
|                                                               | Cancerin (only_miRNA)                        | 124 (3.03%) | 58 (0.92%)  | 75 (1.96%)  |
|                                                               | Correlation-based method                     | 627 (2.43%) | 332 (0.71%) | 357 (2.11%) |
|                                                               | Cancerin (OLS regression)                    | 39 (0.65%)  | 33 (0.17%)  | 60 (0.96%)  |
|                                                               | Cancerin (sensitivity filtering deactivated) | 41 (0.58%)  | 31 (0.16%)  | 59 (0.72%)  |

The numbers in parentheses indicate the percentage of PPIs and TF-gene interactions in the total number of inferred ceRNA interactions.
